# Supplementary material
Source: PubMed Central journal article supplement (PMC3180930)
Supplement: NIHMS318502-supplement-1_si_001.pdf [file NIHMS318502-supplement-1_si_001.pdf]

## Supporting Information

# The Identification and Biological Activities of New Taccalonolide Microtubule Stabilizers

*Jiangnan Peng,<sup>†</sup> April L. Risinger,<sup>†</sup> Gary A. Fest,<sup>†</sup> Evelyn M. Jackson,<sup>†</sup> Gregory Helms,<sup>‡</sup> Lisa A. Polin<sup>§</sup> and Susan L. Mooberry<sup>†</sup>*

*<sup>†</sup>Department of Pharmacology, University of Texas Health Science Center at San Antonio, San Antonio, TX 78229*

*<sup>‡</sup>Nuclear Magnetic Resonance Center, Department of Chemistry, Washington State University, Pullman, WA 99164*

*<sup>§</sup>Barbara Ann Karmanos Cancer Institute, Wayne State University School of Medicine, Hematology-Oncology, Detroit, MI 48201*

## Table of Contents

|                                                  |          |
|--------------------------------------------------|----------|
| <sup>1</sup> H NMR spectrum of taccalonolide Z   | Page S3  |
| <sup>13</sup> C NMR spectrum of taccalonolide Z  | Page S3  |
| COSY spectrum of taccalonolide Z                 | Page S4  |
| HSQC spectrum of taccalonolide Z                 | Page S5  |
| HMBC spectrum of taccalonolide Z                 | Page S6  |
| NOESY spectrum of taccalonolide Z                | Page S7  |
| <sup>1</sup> H NMR spectrum of taccalonolide AA  | Page S8  |
| <sup>13</sup> C NMR spectrum of taccalonolide AA | Page S8  |
| COSY spectrum of taccalonolide AA                | Page S9  |
| HSQC spectrum of taccalonolide AA                | Page S10 |
| HMBC spectrum of taccalonolide AA                | Page S11 |
| <sup>1</sup> H NMR spectrum of taccalonolide AB  | Page S12 |
| <sup>13</sup> C NMR spectrum of taccalonolide AB | Page S12 |
| COSY spectrum of taccalonolide AB                | Page S13 |
| HSQC spectrum of taccalonolide AB                | Page S14 |
| HMBC spectrum of taccalonolide AB                | Page S15 |

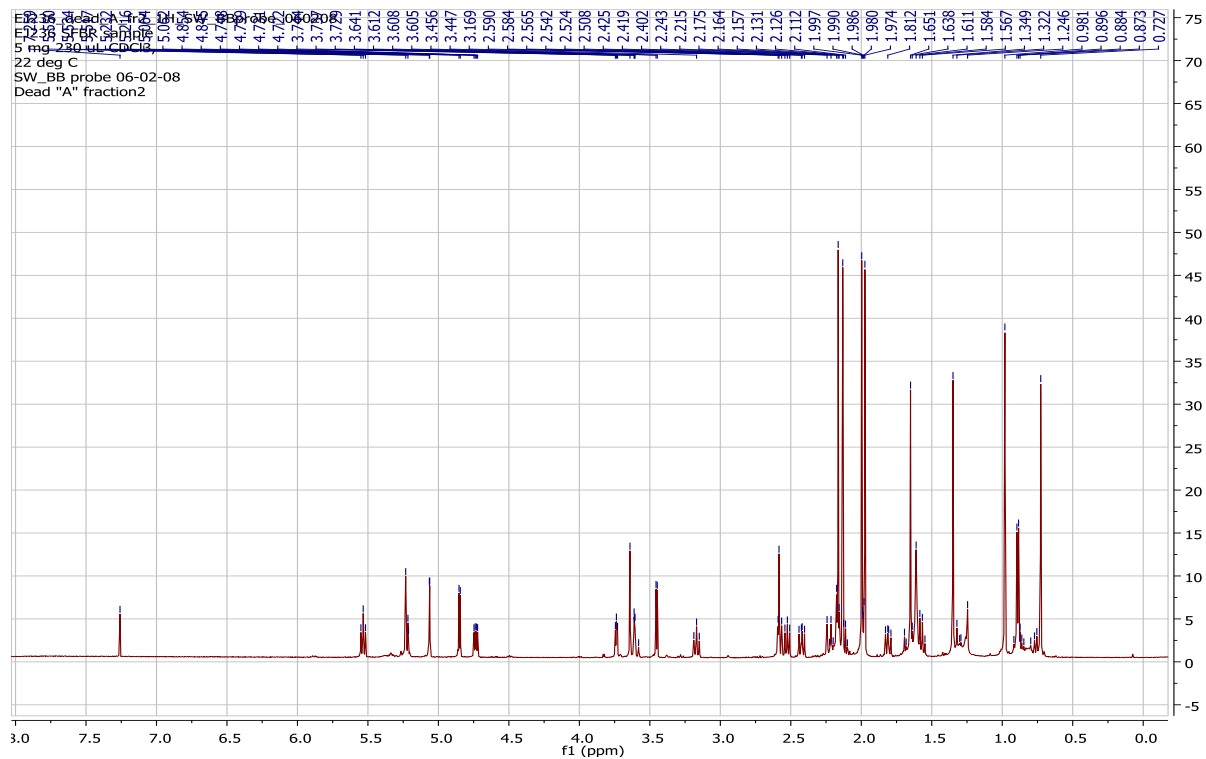

<sup>1</sup>H NMR spectrum of taccalonolide Z

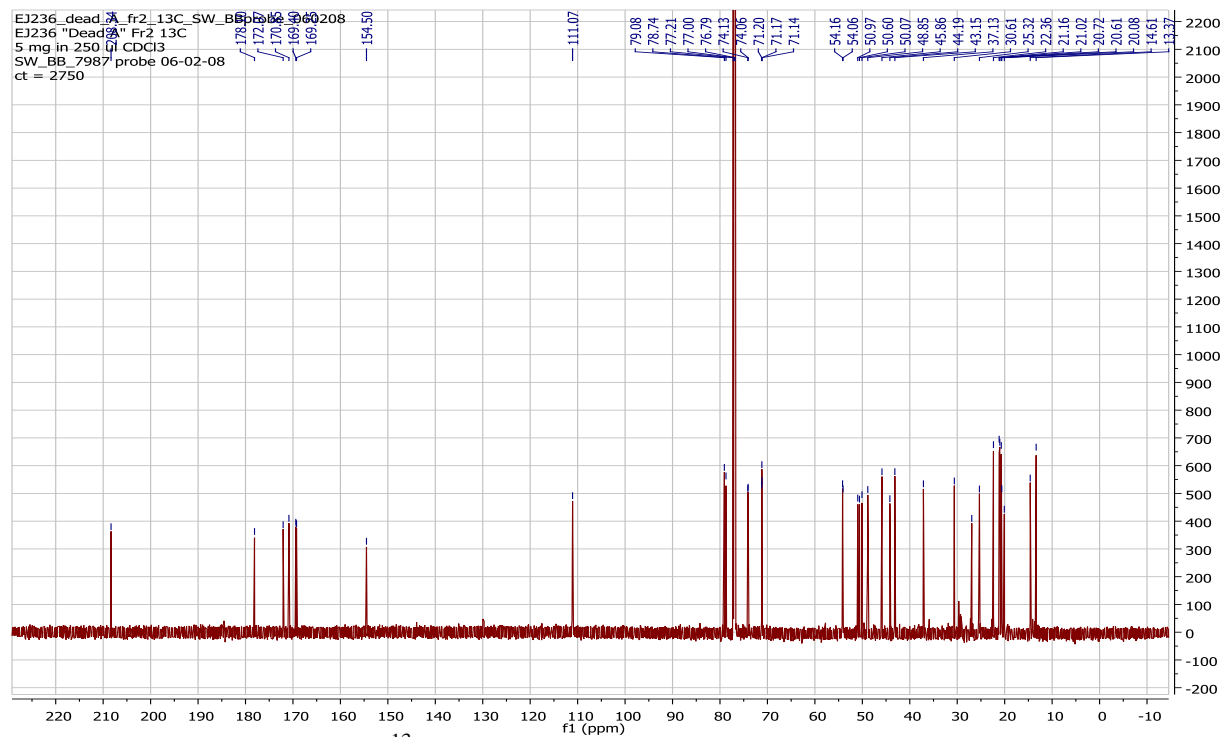

<sup>13</sup>C NMR spectrum of taccalonolide Z

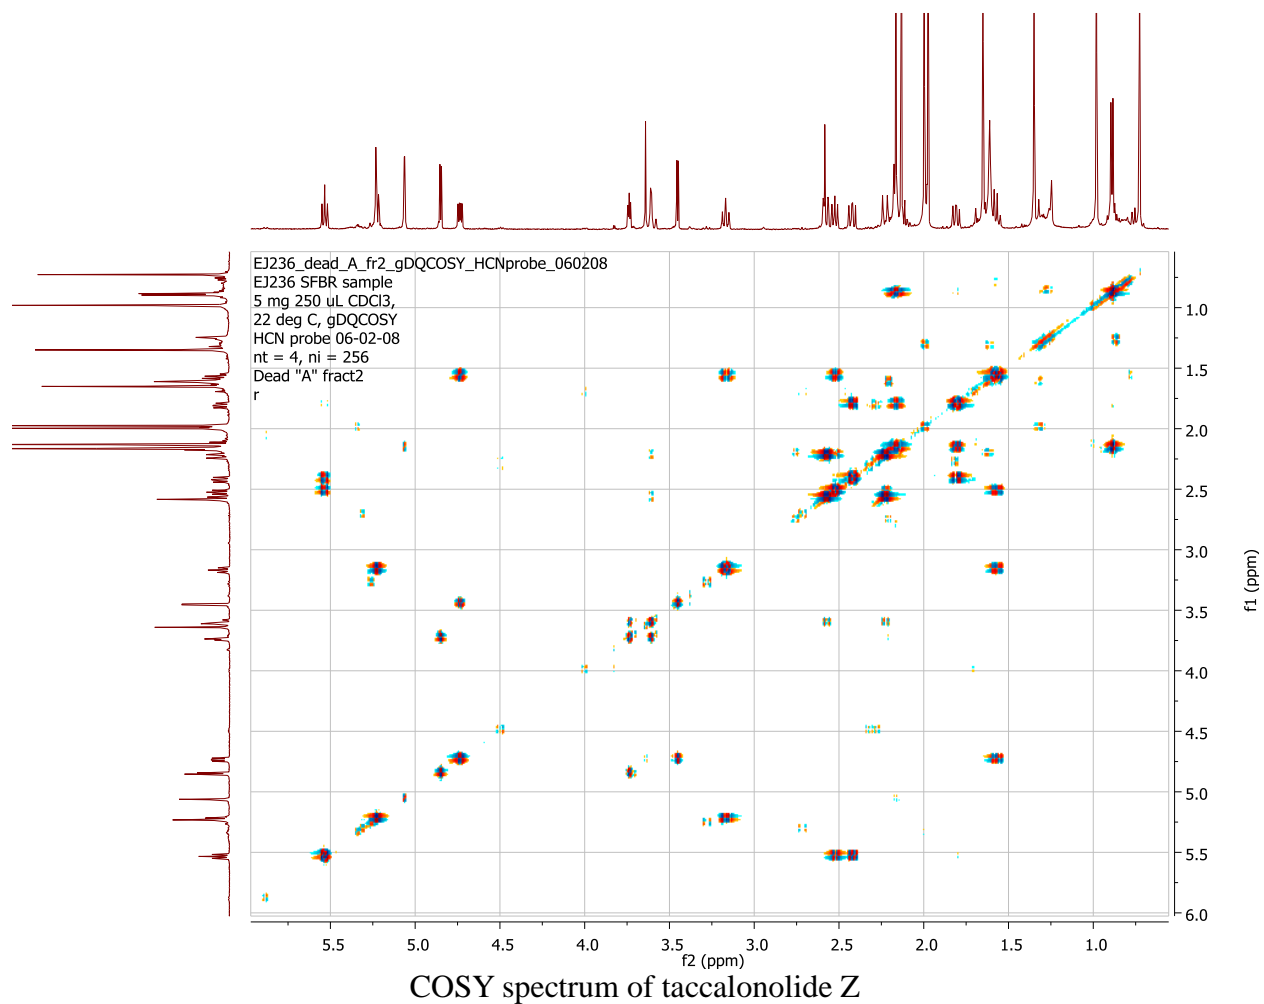

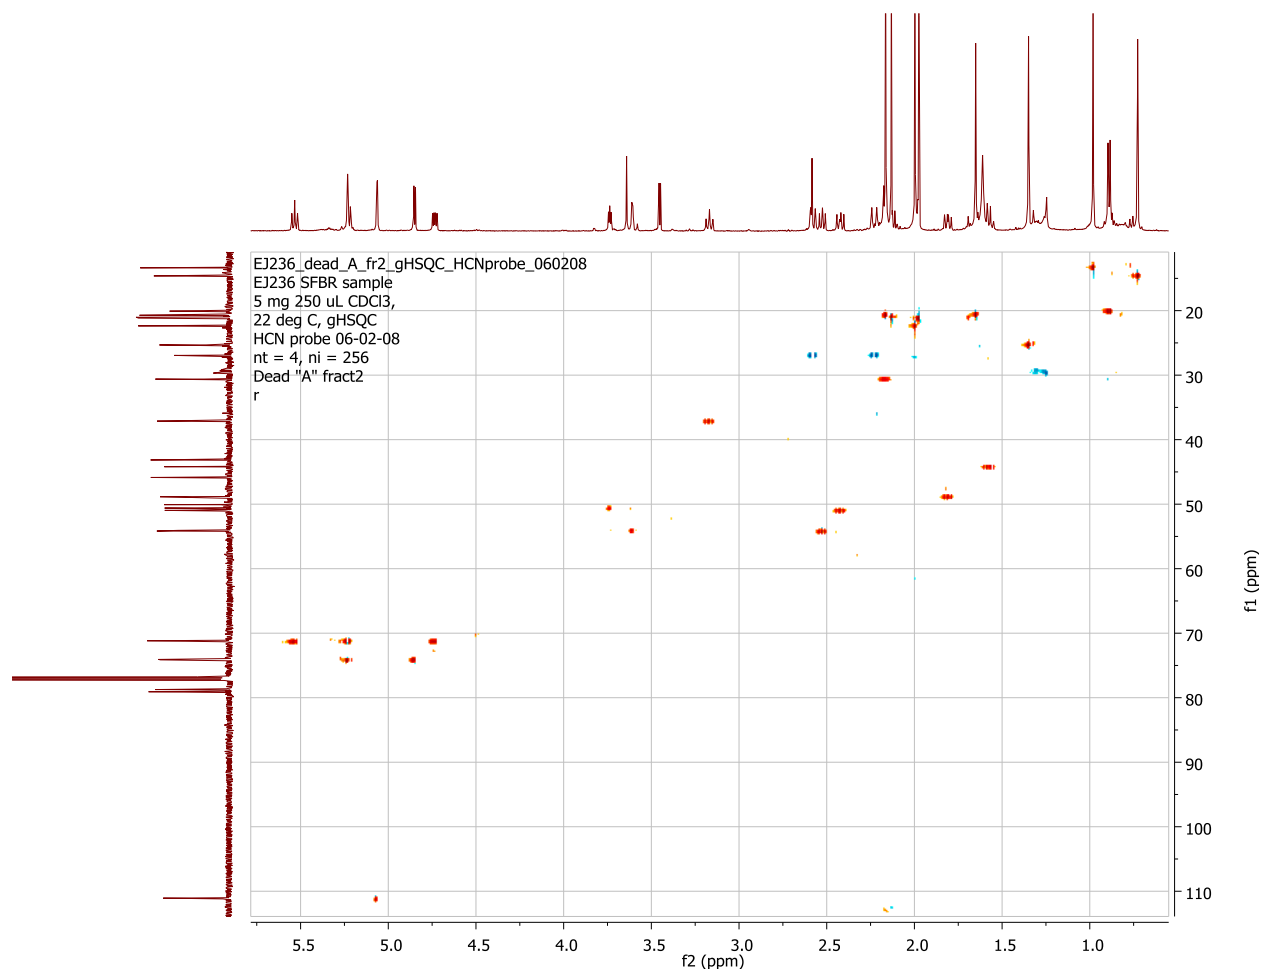

HSQC spectrum of taccalonolide Z

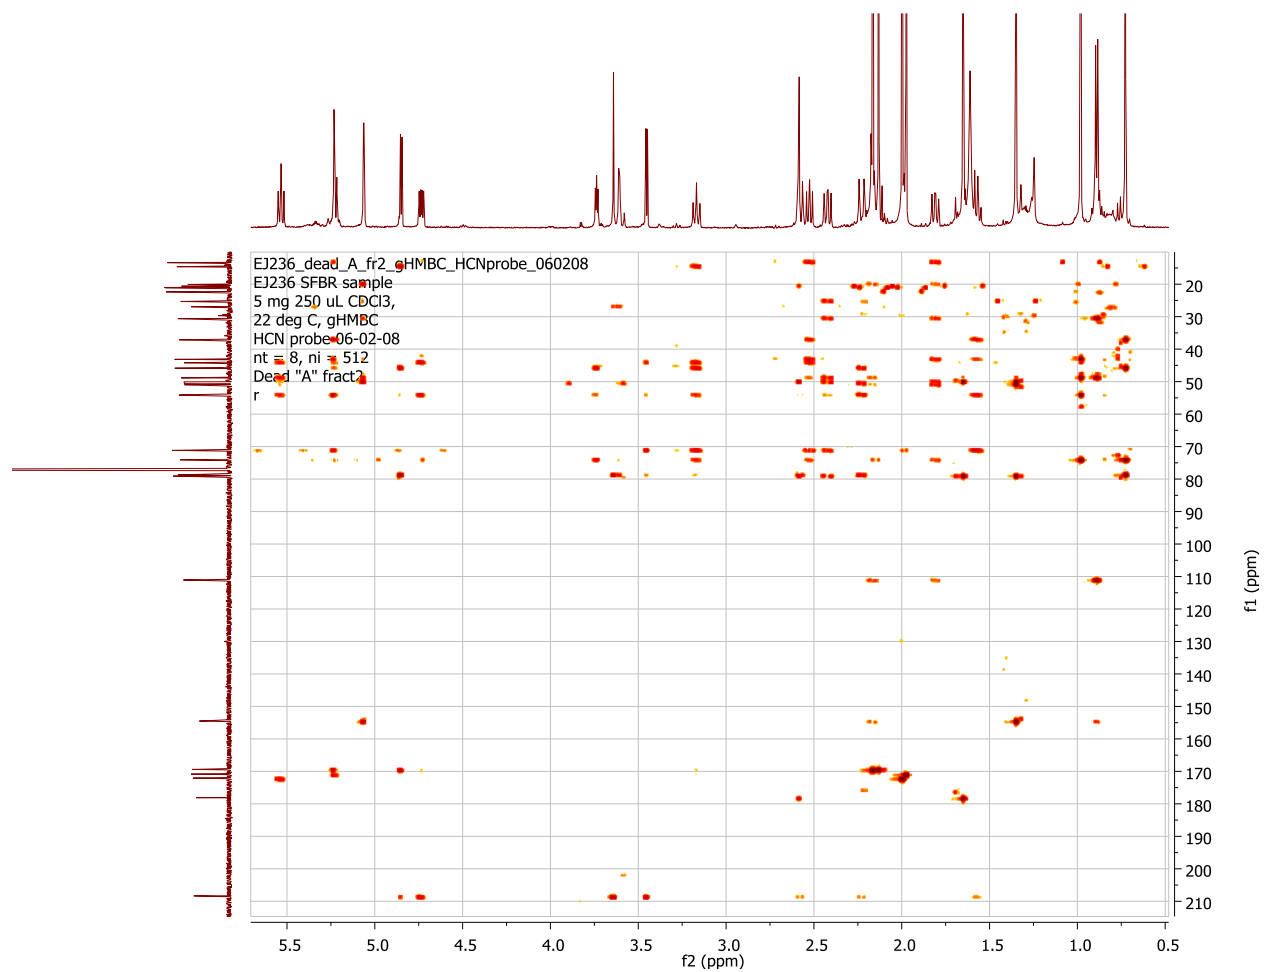

HMBC spectrum of taccalonolide Z

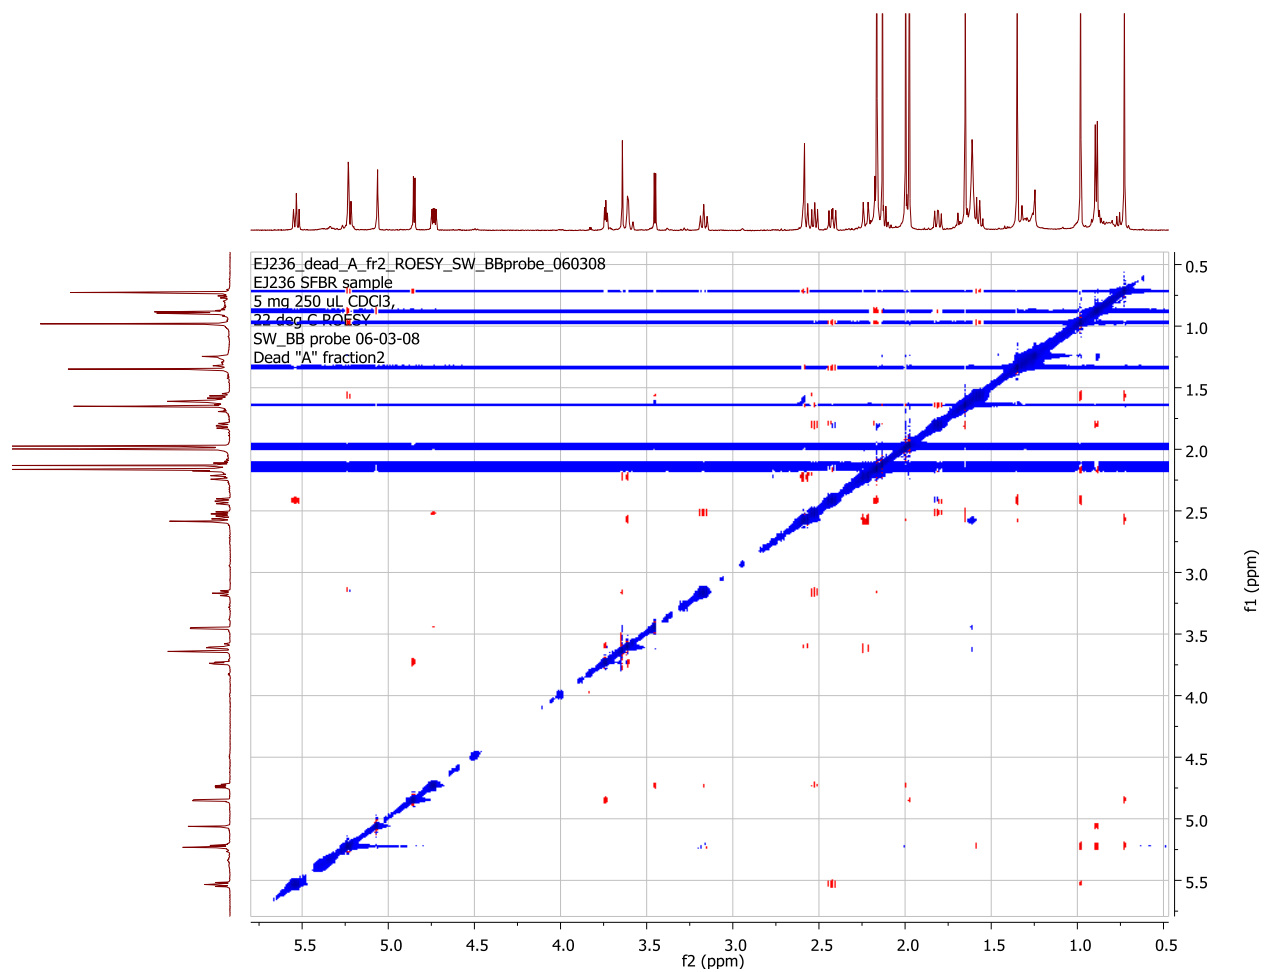

NOESY spectrum of taccalonolide Z

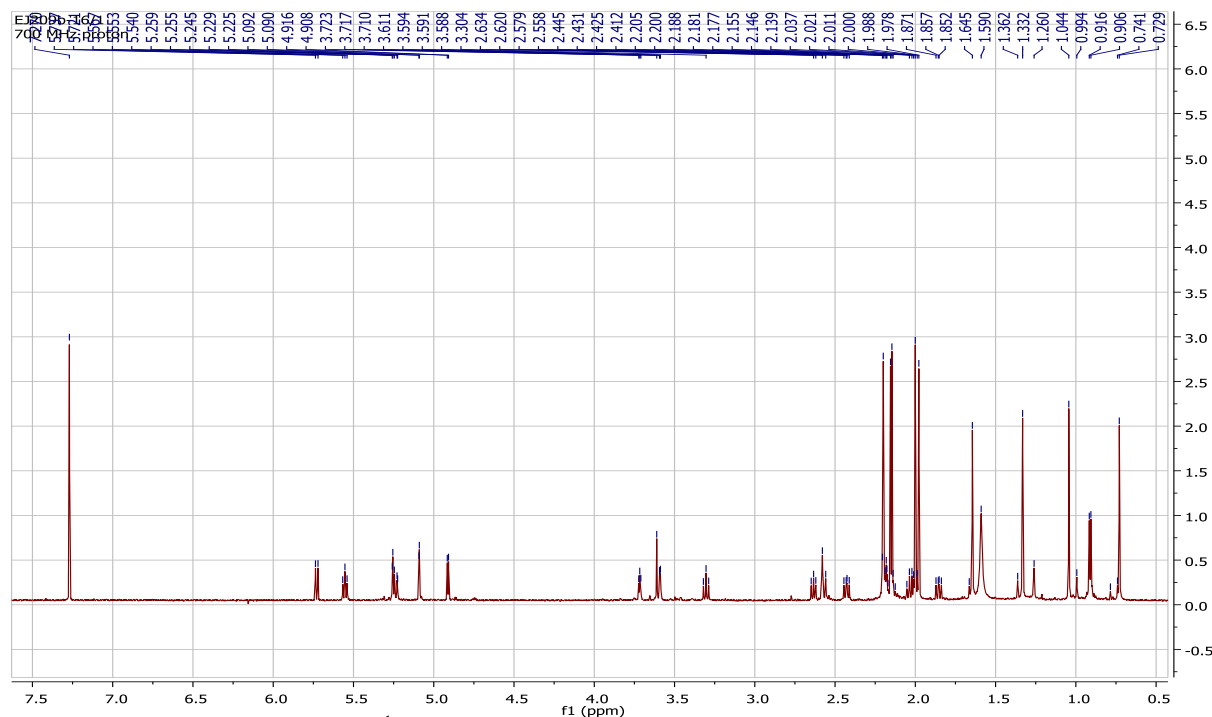

$^1\text{H}$  NMR spectrum of taccalonolide AA

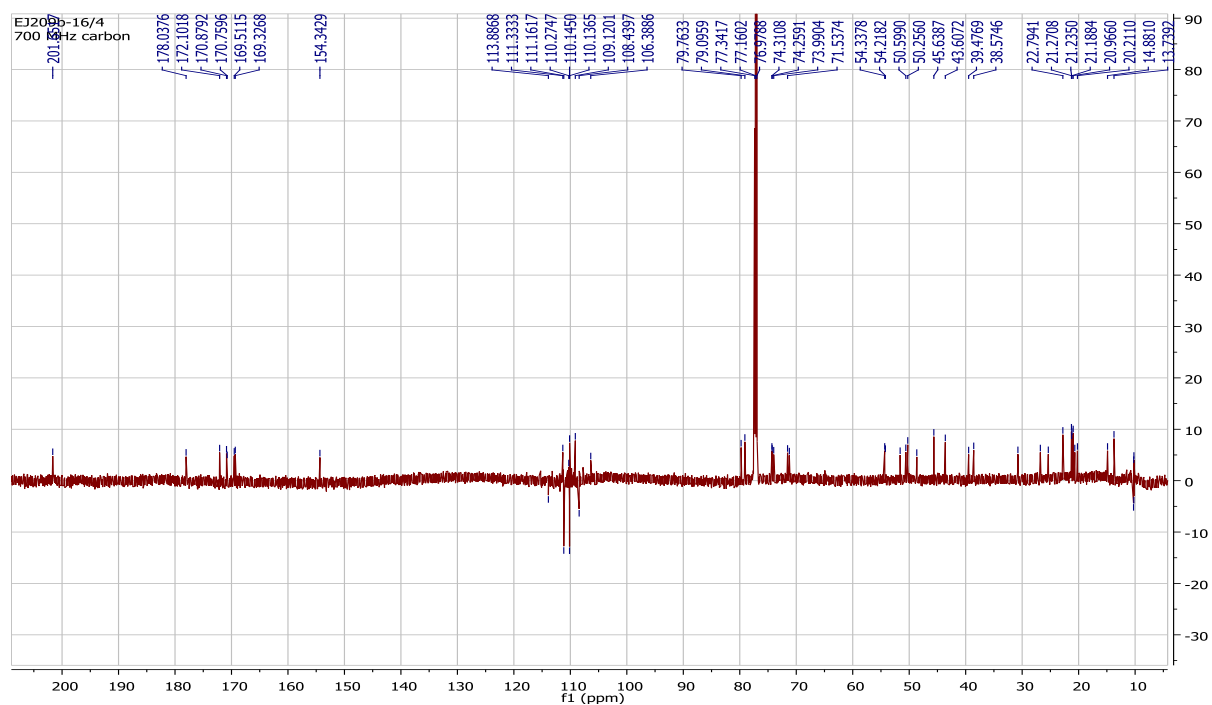

$^{13}\text{C}$  NMR spectrum of taccalonolide AA



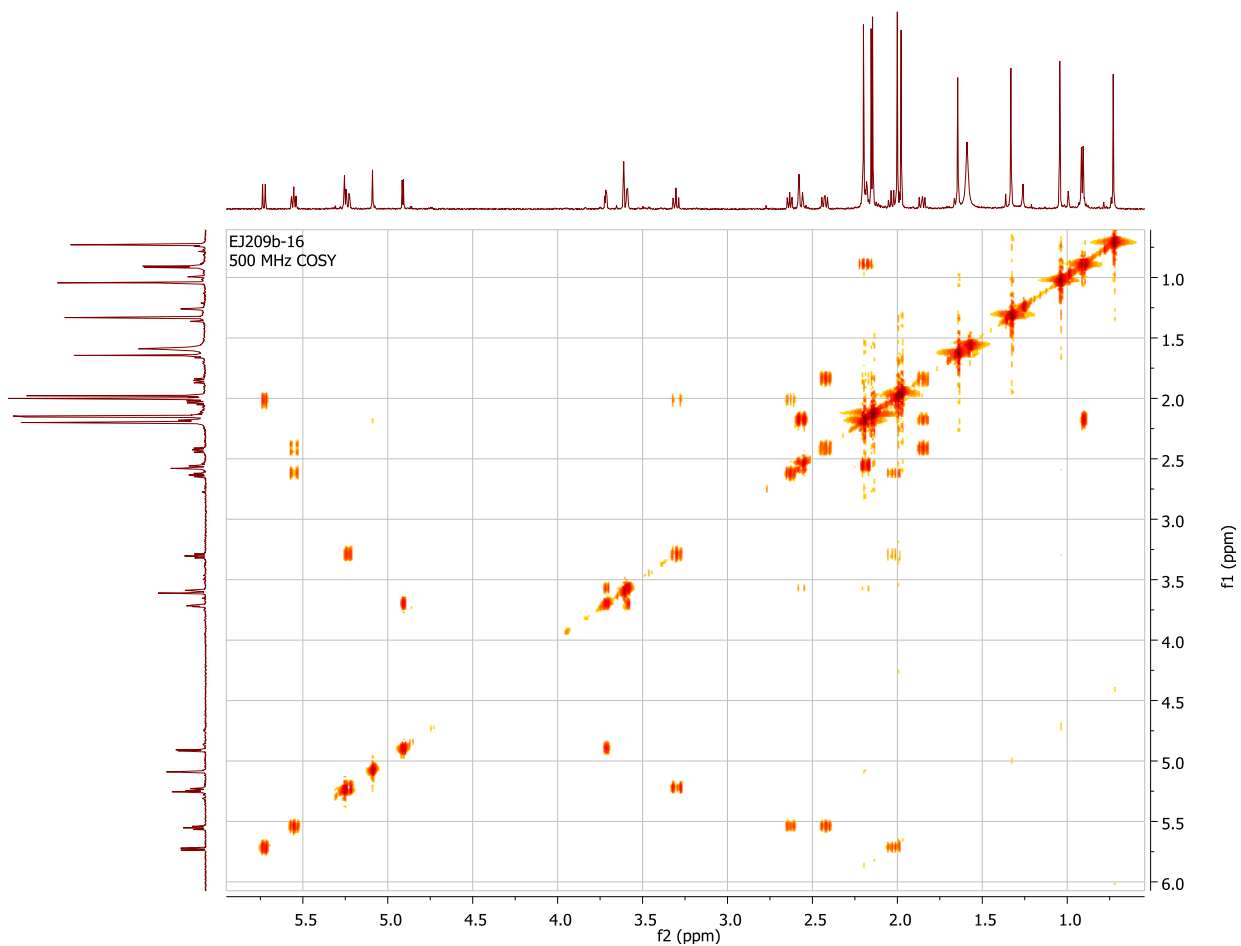

COSY spectrum of taccalonolide AA

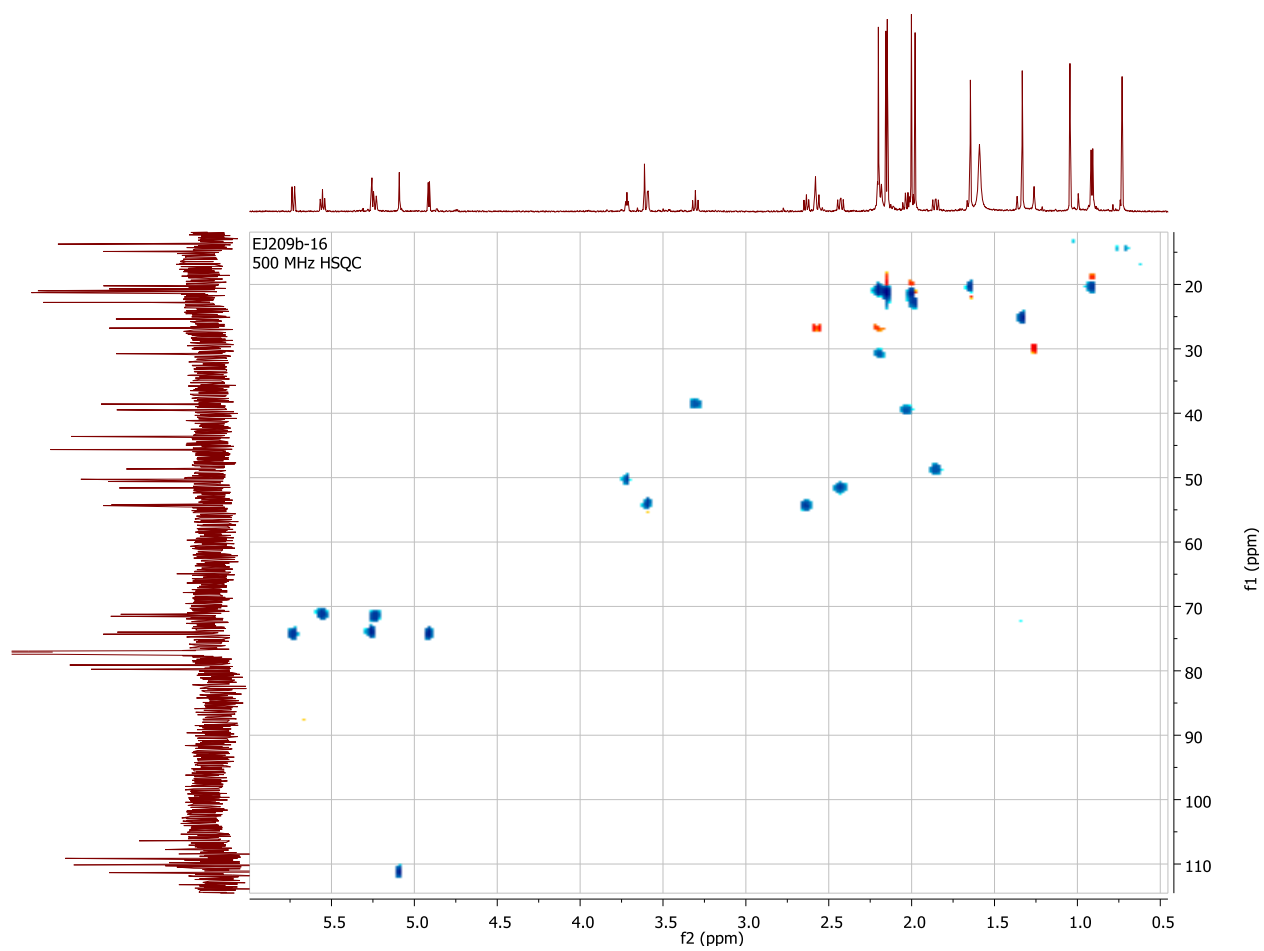

HSQC spectrum of taccalonolide AA

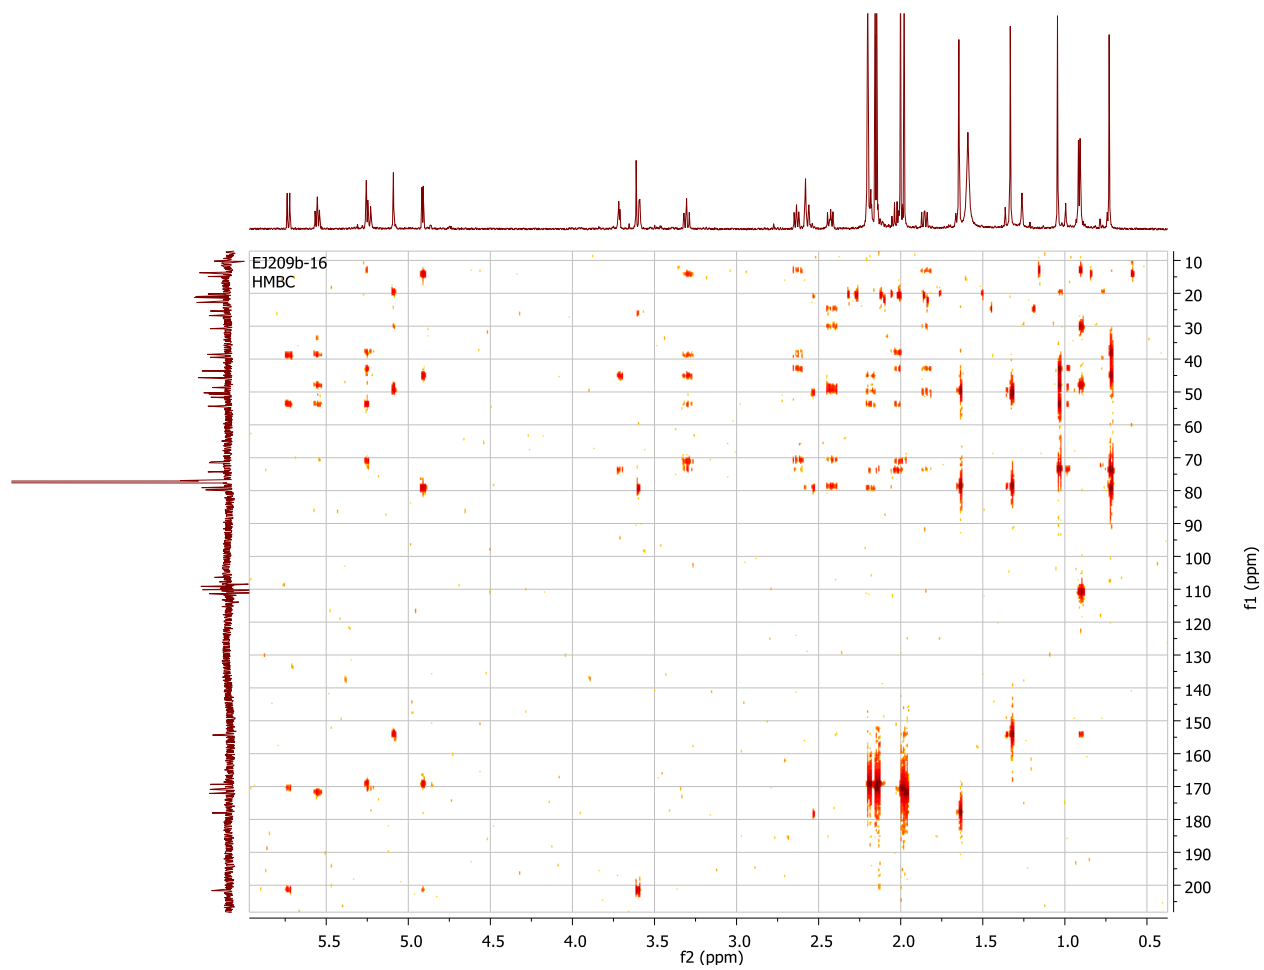

HMBC spectrum of taccalonolide AA

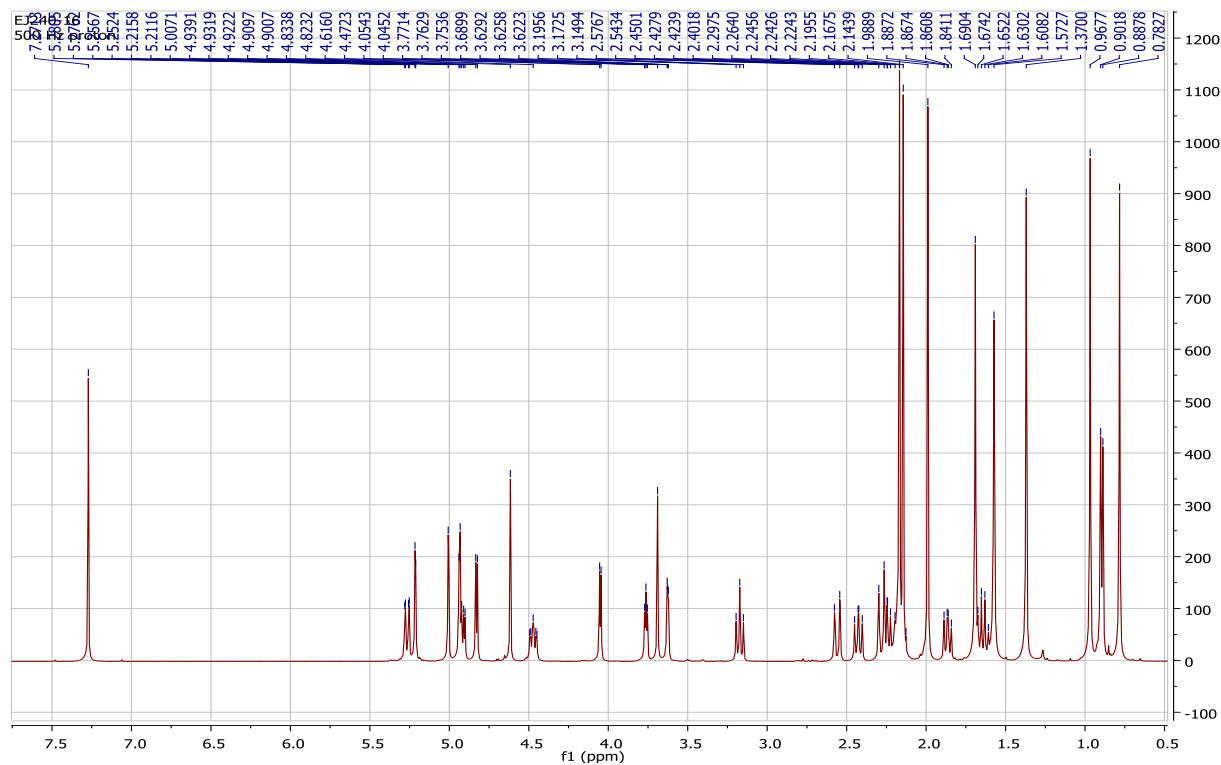

<sup>1</sup>H NMR spectrum of taccalonolide AB

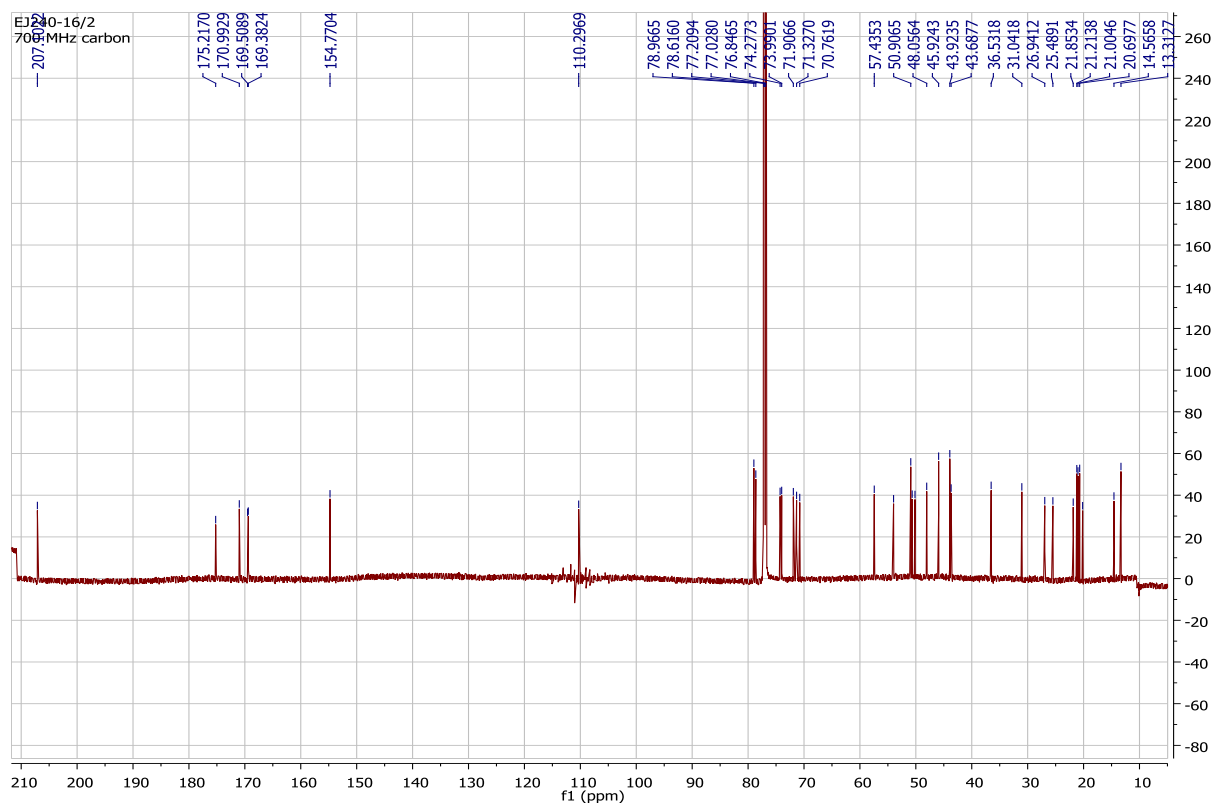

<sup>13</sup>C NMR spectrum of taccalonolide AB

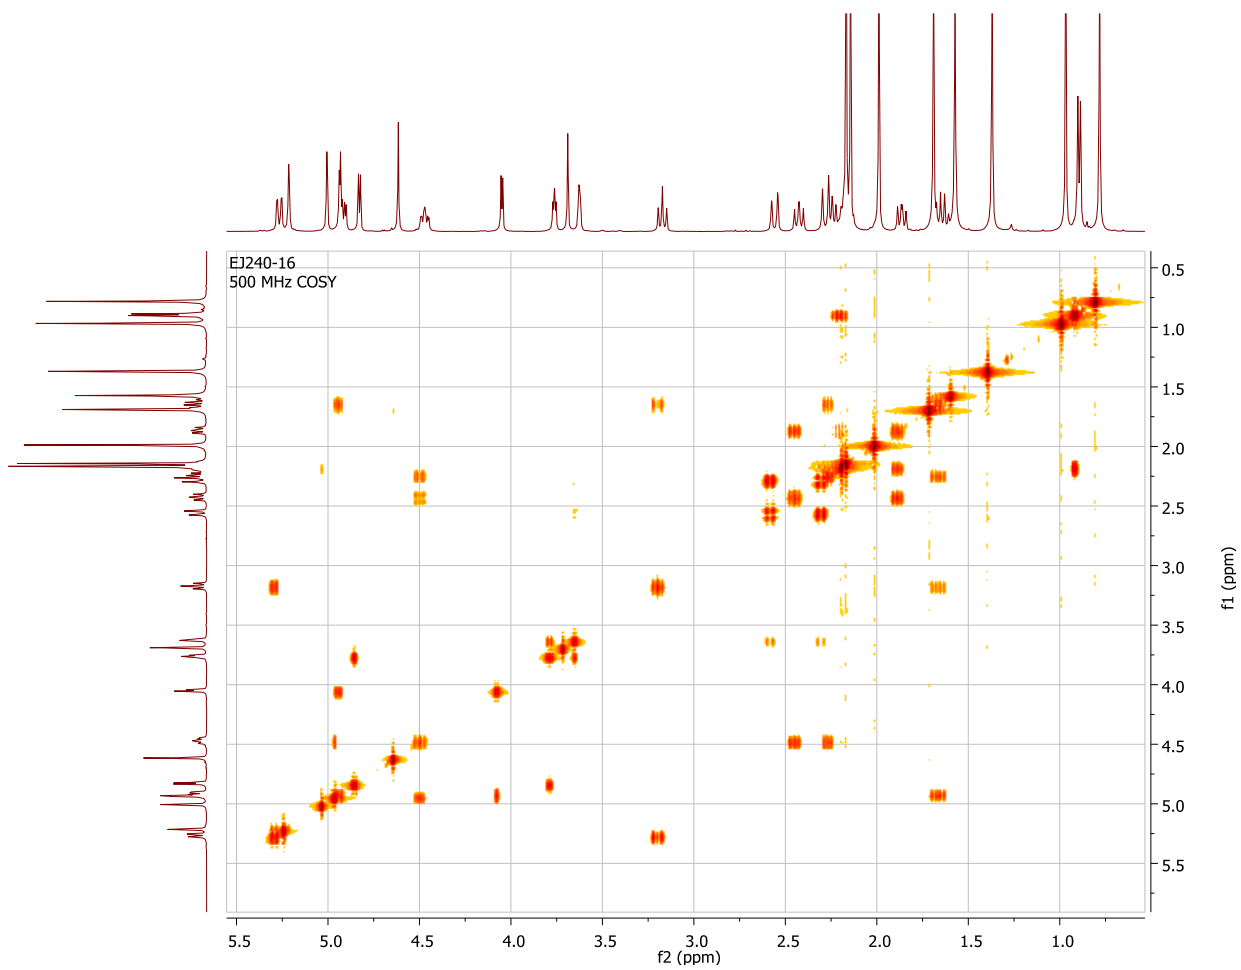

COSY spectrum of taccalonolide AB

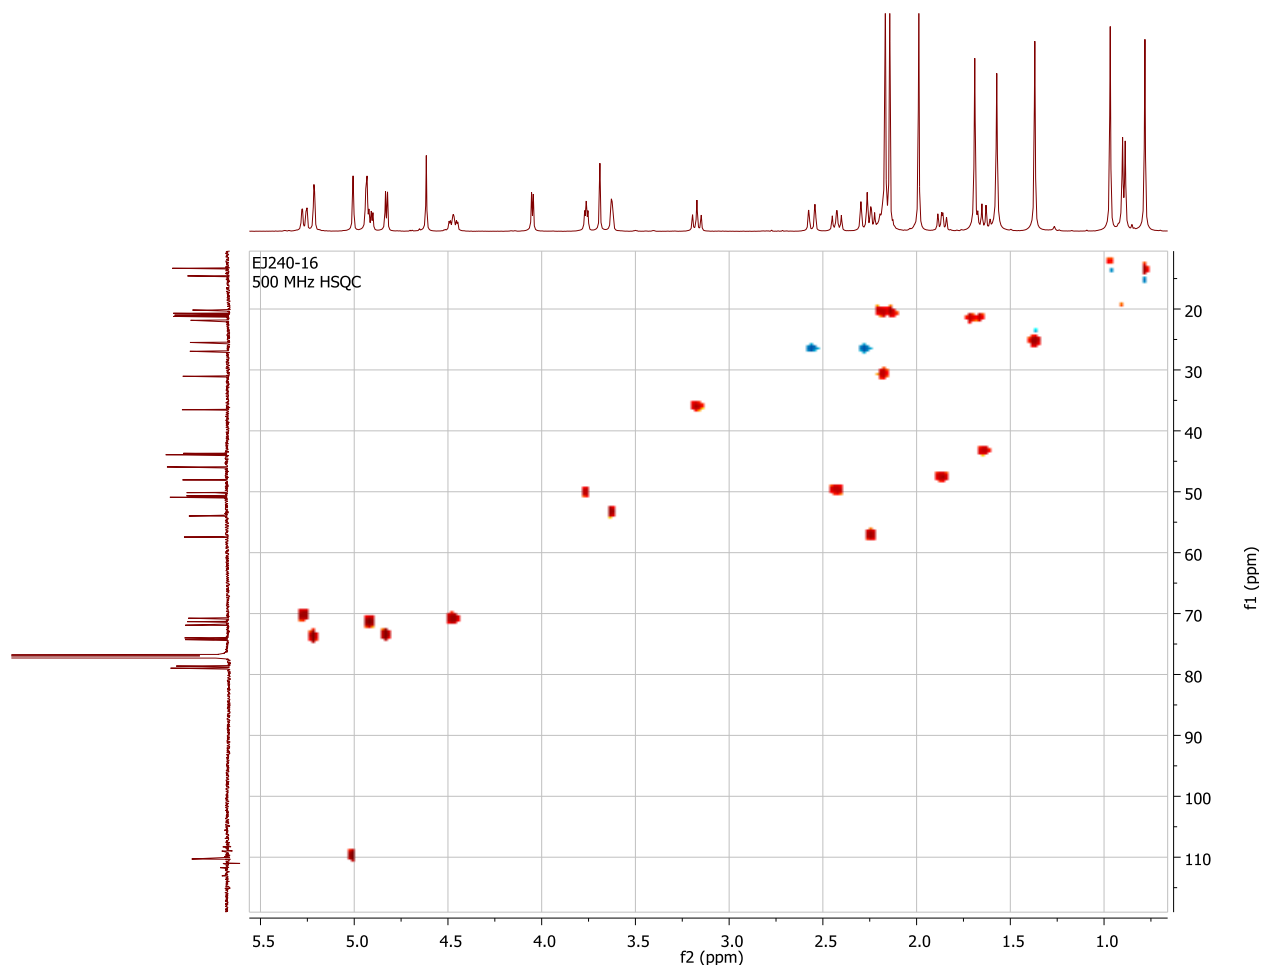

HSQC spectrum of taccalonolide AB

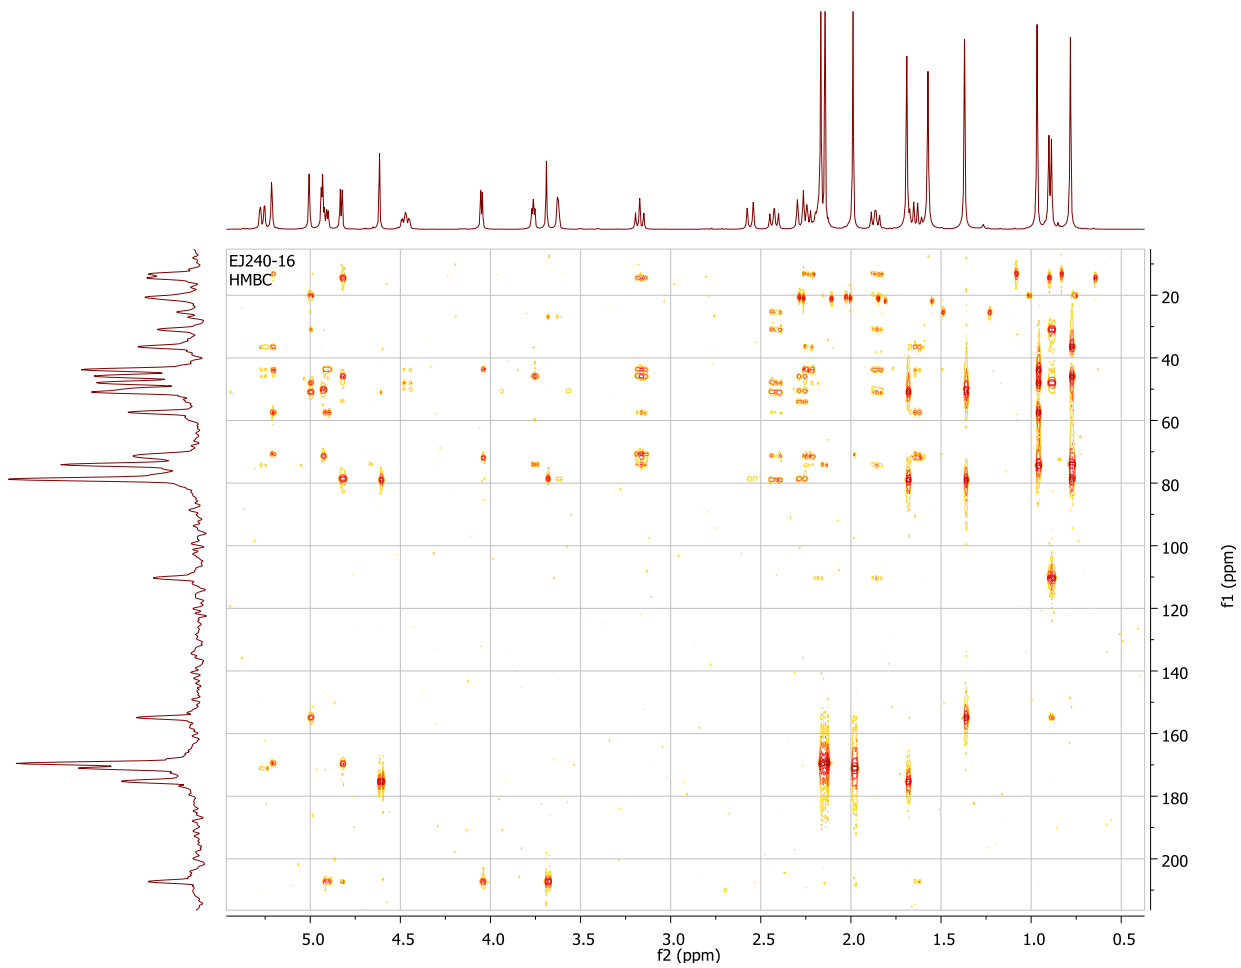

HMBC spectrum of taccalonolide AB
